# Supplementary material for: Comparison of the synergistic effect of counterions on the inhibition of mild steel corrosion in acid solution: electrochemical, gravimetric and thermodynamic studies
Source: Royal Society of Chemistry journal article supplement (doi:10.1039/c4ra12286k), 2014-12-15
Supplement: c4ra12286k1.pdf [file c4ra12286k1.pdf]

## Electronic Supplementary Information

### Comparison of Synergistic Effect of Counterions on Corrosion Inhibition for Mild Steel in Acid Solution: Electrochemical, Gravimetric and Thermodynamic Studies

Li Bai<sup>a</sup>, La-Jun Feng<sup>a</sup>, Hong-Yan Wang<sup>b\*</sup>, Yong-Bin Lu<sup>c</sup>, Xiao-Wei Lei<sup>d</sup>, Fang-Lin Bai<sup>c</sup>

<sup>a</sup> School of Materials Science and Engineering, Xi'an University of Technology, Xi'an 710048, P.R. China

<sup>b</sup> School of Chemistry and Chemical Engineering, Shaanxi Normal University, Xi'an 710119, P. R. China

<sup>c</sup> Research Institute of Yanchang Petroleum (Group) CO. LTD, Xi'an 710075, P.R. China

<sup>d</sup> State Key Laboratory for Mechanical Behavior of Materials, Xi'an Jiaotong University, Xi'an 710049, P.R. China

Corresponding author. Tel.: +46 0729428391.

E-mail address: [hongyan-wang@snnu.edu.cn](mailto:hongyan-wang@snnu.edu.cn) (H. Y. Wang).

Received (in XXX, XXX) Xth XXXXXXXXXX 20XX, Accepted Xth XXXXXXXXXX 20XX

DOI: 10.1039/b000000x

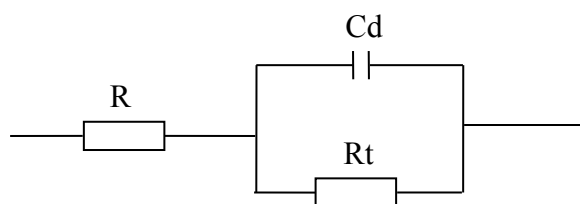

**Fig. S1** Electrical equivalent circuit used for modeling metal/solution interface in the absence or presence of inhibitors **1** or **2** in 1.0 M HCl at 25 °C

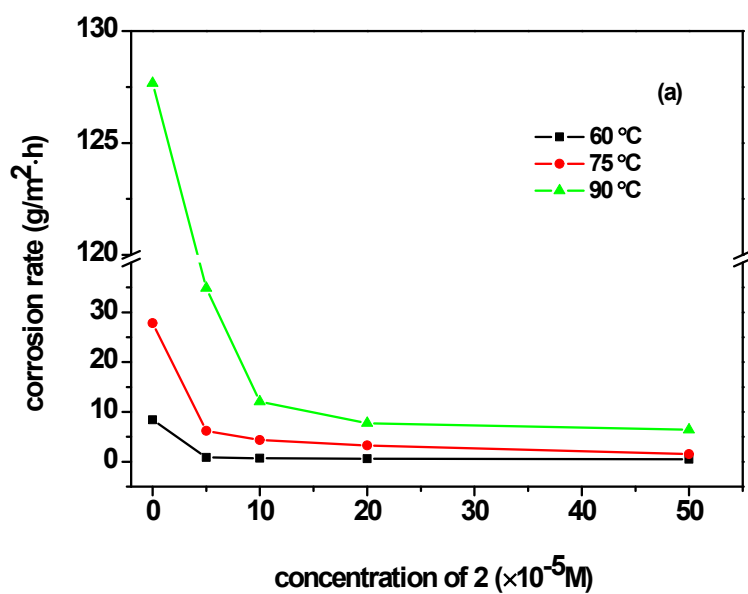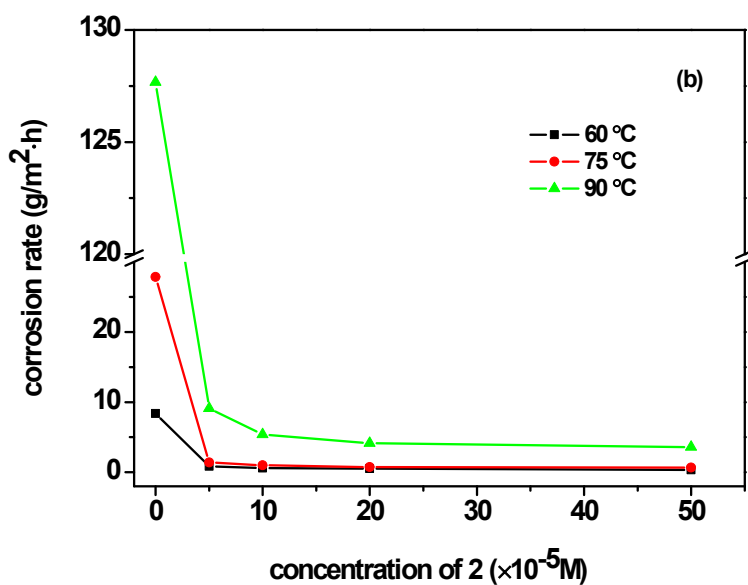

**Fig. S2** Variation of corrosion rate for mild steel with different concentration of inhibitor **1(a)** and **2(b)** in 1.0 M HCl at 60 °C, 75 °C, and 90 °C respectively

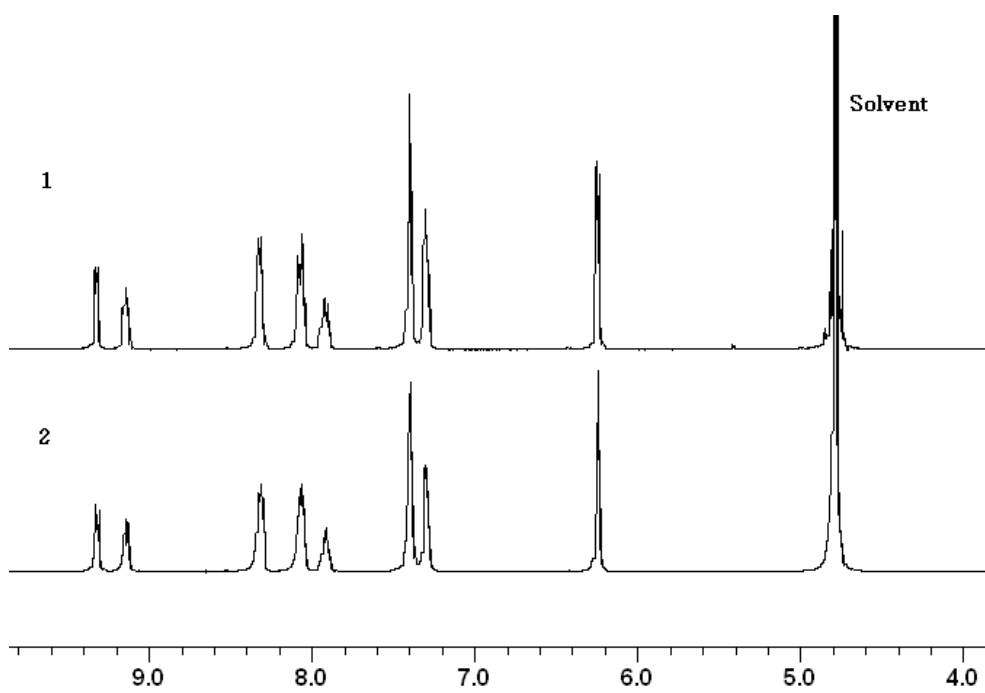

**Fig. S3** <sup>1</sup>H NMR spectrum of **1** and **2** in D<sub>2</sub>O respectively

**Table S1** Electrochemical parameters from Tafel polarization curves and inhibitionefficiency of **1** and **2** in 1.0 M HCl at 25 °C

| <i>Inhibitor</i> | <i>Concentration,</i><br>M | $E_{corr}$ ,<br>mV | $I_{corr}$ ,<br>$\mu\text{A}\cdot\text{cm}^{-2}$ | $\beta_a$ ,<br>mV | $\beta_c$ ,<br>mV | $\eta_p$ , % |
|------------------|----------------------------|--------------------|--------------------------------------------------|-------------------|-------------------|--------------|
| <b>1</b>         | 0                          | -438.04            | 235.67                                           | 73.996            | 87.288            | --           |
|                  | $5.0\times 10^{-5}$        | -423.72            | 26.24                                            | 66.668            | 117.05            | 88.87        |
|                  | $1.0\times 10^{-4}$        | -426.66            | 21.43                                            | 81.834            | 115.40            | 90.91        |
|                  | $2.0\times 10^{-4}$        | -425.27            | 16.25                                            | 94.496            | 118.71            | 93.11        |
|                  | $1.0\times 10^{-3}$        | -415.33            | 13.03                                            | 74.956            | 139.12            | 94.47        |
| <b>2</b>         | 0                          | -438.04            | 235.67                                           | 73.996            | 87.288            | --           |
|                  | $5.0\times 10^{-5}$        | -420.68            | 31.22                                            | 68.485            | 124.01            | 86.75        |
|                  | $1.0\times 10^{-4}$        | -423.56            | 25.94                                            | 75.002            | 107.61            | 88.99        |
|                  | $2.0\times 10^{-4}$        | -419.5             | 18.83                                            | 65.157            | 113.86            | 92.01        |
|                  | $1.0\times 10^{-3}$        | -412.01            | 14.97                                            | 64.112            | 122.11            | 93.65        |

**Table S2** EIS parameters for corrosion of mild steel containing differentconcentrations of **1** and **2** in 1.0 M HCl at 25 °C respectively

| <i>Inhibitor</i> | <i>Concentration, M</i> | <i>R<sub>s</sub>, Ω·cm<sup>2</sup></i> | <i>C<sub>dl</sub>, μF/cm<sup>2</sup></i> | <i>R<sub>t</sub>, Ω·cm<sup>2</sup></i> | <i>η<sub>i</sub>, %</i> |
|------------------|-------------------------|----------------------------------------|------------------------------------------|----------------------------------------|-------------------------|
| <b>1</b>         | 0                       | 1.99                                   | 139.7                                    | 236.8                                  | 0.00                    |
|                  | 5.0×10 <sup>-5</sup>    | 2.168                                  | 90.612                                   | 655.9                                  | 63.90                   |
|                  | 1.0×10 <sup>-4</sup>    | 2.021                                  | 80.31                                    | 730.7                                  | 67.59                   |
|                  | 2.0×10 <sup>-4</sup>    | 2.164                                  | 83.99                                    | 858                                    | 72.4                    |
|                  | 1.0×10 <sup>-3</sup>    | 2.134                                  | 73.29                                    | 1123                                   | 78.91                   |
| <b>2</b>         | 0                       | 1.99                                   | 139.7                                    | 236.8                                  | 0.00                    |
|                  | 5.0×10 <sup>-5</sup>    | 2.078                                  | 111.66                                   | 406.4                                  | 41.73                   |
|                  | 1.0×10 <sup>-4</sup>    | 2.198                                  | 89.21                                    | 542.6                                  | 56.36                   |
|                  | 2.0×10 <sup>-4</sup>    | 2.029                                  | 73.04                                    | 681.4                                  | 65.25                   |
|                  | 1.0×10 <sup>-3</sup>    | 2.149                                  | 58.17                                    | 924.1                                  | 74.38                   |

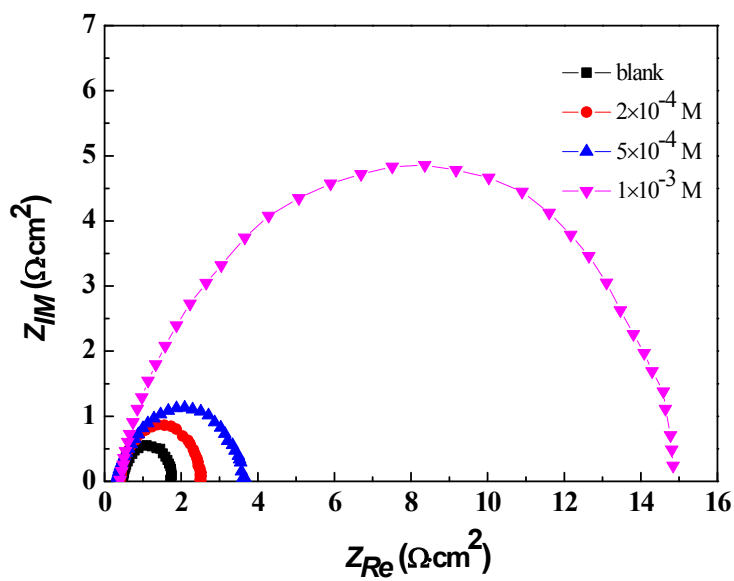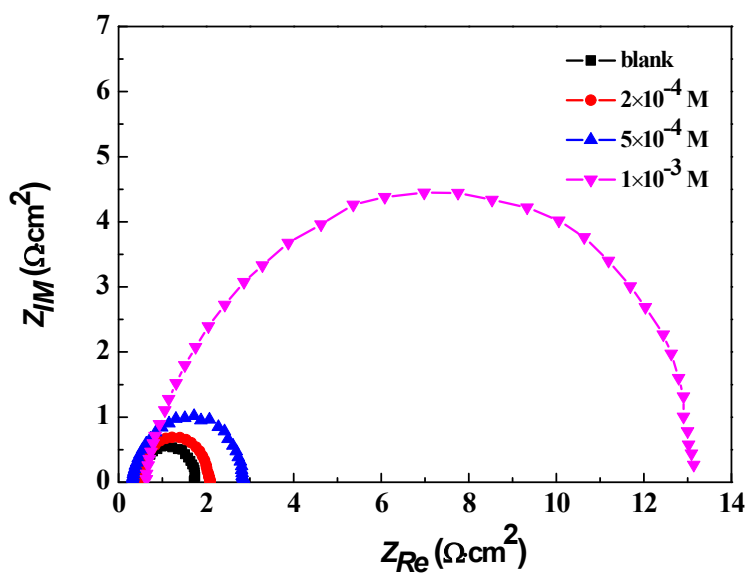

**Fig. S4** EIS behavior of mild steel containing different concentrations of **1** (a) and **2** (b) in 1.0 M HCl at 90 °C respectively

**Table S3** EIS parameters for corrosion of mild steel containing different concentrations of **1** and **2** in 1.0 M HCl at 90 °C respectively

| <i>inhibitor</i> | <i>Concentration,</i><br>(10 <sup>-4</sup> M) | <i>R<sub>s</sub>, Ω·cm<sup>2</sup></i> | <i>C<sub>dl</sub>, μF/cm<sup>2</sup></i> | <i>R<sub>t</sub>, Ω·cm<sup>2</sup></i> | <i>η<sub>i</sub>, %</i> |
|------------------|-----------------------------------------------|----------------------------------------|------------------------------------------|----------------------------------------|-------------------------|
| <b>1</b>         | 0                                             | 0.47                                   | 0.94                                     | 1.29                                   | 0                       |
|                  | 2.0×10 <sup>-4</sup>                          | 0.49                                   | 0.91                                     | 1.58                                   | 18.35                   |
|                  | 5.0×10 <sup>-4</sup>                          | 0.31                                   | 0.87                                     | 2.46                                   | 47.56                   |
|                  | 1.0×10 <sup>-3</sup>                          | 0.58                                   | 0.80                                     | 12.61                                  | 89.77                   |
| <b>2</b>         | 0                                             | 0.47                                   | 0.94                                     | 1.29                                   | 0                       |
|                  | 2.0×10 <sup>-4</sup>                          | 0.40                                   | 0.89                                     | 2.12                                   | 39.15                   |
|                  | 5.0×10 <sup>-4</sup>                          | 0.31                                   | 0.79                                     | 3.32                                   | 61.14                   |
|                  | 1.0×10 <sup>-3</sup>                          | 0.39                                   | 0.71                                     | 14.03                                  | 90.81                   |

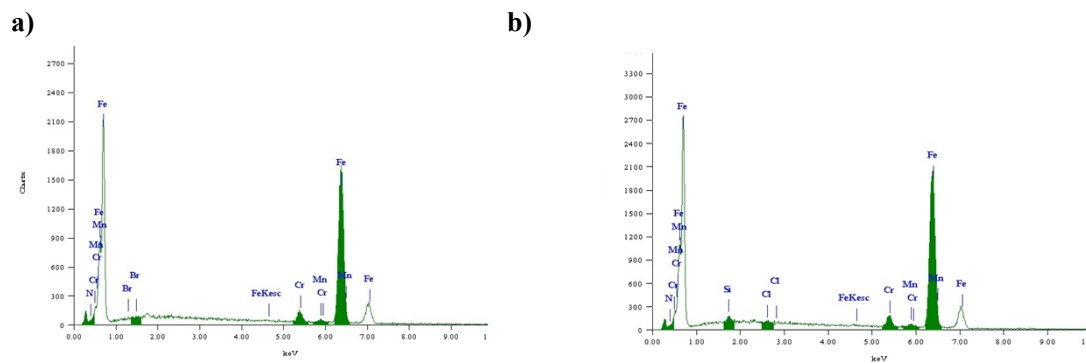

|          | Element | (kev) | Mass (%) | Atom (%) |
|----------|---------|-------|----------|----------|
| <b>1</b> | C       | 0.277 | 3.53     | 14.21    |
|          | N       | 0.392 | 0.76     | 2.64     |
|          | Br      | 1.480 | 0.10     | 0.06     |
|          | Fe      | 6.398 | 92.30    | 80.01    |
| <b>2</b> | C       | 0.277 | 2.86     | 11.62    |
|          | N       | 0.392 | 1.03     | 3.60     |
|          | Cl      | 2.621 | 0.17     | 0.23     |
|          | Fe      | 6.398 | 91.97    | 80.39    |

**Fig. S5** the EDX spectrum of steel surface with:  $2.0 \times 10^{-4}$  M **1** (a) and **2** (b) after immersion at 90 °C for 4h
